# Supplementary material for: Prognostic Significance of MRE11 Overexpression in Colorectal Cancer Patients
Source: MDPI journal article supplement (doi:10.3390/cancers15092438), 2023-04-24
Supplement: s1 [file s1]

# Supplementary Materials: Prognostic significance of MRE11 overexpression in colorectal cancer patients

Vincent Ho <sup>1,2, ¶, \*</sup>, Liping Chung <sup>1,2, ¶</sup>, Kate Wilkinson <sup>2,3</sup>, Vivienne Lea<sup>1,3</sup>, Stephanie H Lim <sup>2,4,5</sup>, Askar Abubakar <sup>1,2</sup>, Weng Ng <sup>5</sup>, Mark Lee <sup>6</sup>, Tara L Roberts <sup>1,2,7</sup>, Wei Chua <sup>1,5,8</sup> and Cheok Soon Lee <sup>1,2,3,7, 9</sup>

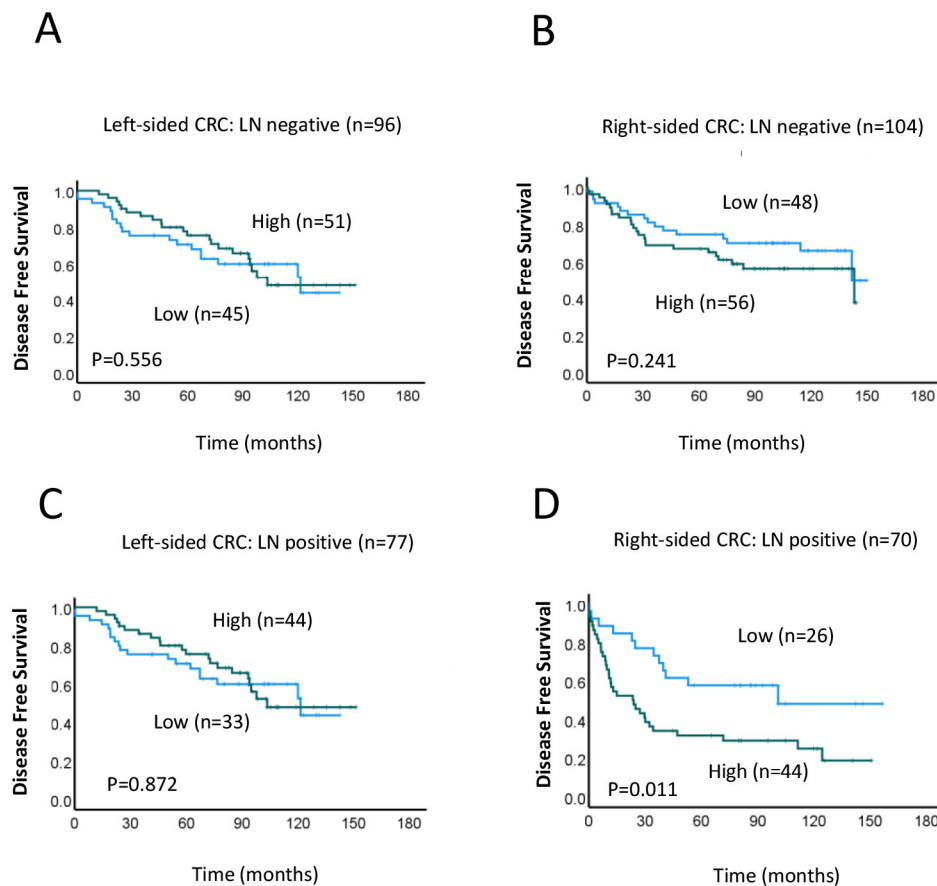

**Supplementary Figure S1. Association between MRE11 expression and survival, based on location of the primary colorectal cancer (CRC) in relation to lymph node (LN) involvement.** (A–D) Kaplan–Meier analysis of disease-free survival in patients with high (green line) or low (blue line) MRE11 expression in left-sided (A, LN-negative; C, LN-positive) and right-sided (B, LN-negative; D, LN-positive) CRC.
